# Supplementary material for: A transcriptomic reporter assay employing neutrophils to measure immunogenic activity of septic patients’ plasma
Source: J Transl Med. 2014 Mar 11;12:65. doi: 10.1186/1479-5876-12-65 (PMC4007645; doi:10.1186/1479-5876-12-65)
Supplement: Additional file 1: Table S1 — Demographic and clinical data for subjects used in experiment I. [file 1479-5876-12-65-S1.xls]

## Sheet: Sheet1
Table S1 Demographic and clinical data for subjects used in experiment 1
Sample ID	Bacterial isolation	Age	Gender	Days of blood collection	Length of hospitalization	Discharge status	Underlying disease	Shock	Acute Renal Failure	White blood cell count (10^3/ml)	Platelet (10^3/ml)	Neutrophils (%)	Creatinine (mg/dL)	Bilirubin (mg/dL)	Severity grading*
Bp1	Burkholderia pseudomallei	57	Male	1	10	Not improved	T2D	Y	Y	9.8	65	94	3.9	2.3	Severe
Bp2	Burkholderia pseudomallei	50	Male	22	36	Dead	T2D	Y	Y	11.5	190	95.6	4.9	1.3	Severe
Bp3	Burkholderia pseudomallei	72	Male	2	2	Dead	T2D	Y	-	23	75	79	1.8	7.3	Severe
Bp4	Burkholderia pseudomallei	66	Male	4	6	Dead	-	-	Y	-	-	-	-	-	Severe
Bp5	Burkholderia pseudomallei	85	Male	3	6	Recovered	-	-	-	9.7	142	86	1.7	-	Non-severe
Bp6	Burkholderia pseudomallei	44	Male	4	17	Dead	Hypertension, Autoimmune disease	-	-	4.9	237	70.7	0.6	-	Severe
Ot1	Streptococcus pnumoniae	24	Male	0	1	Dead	-	Y	Y	-	-	-	2.2	-	Severe
Ot2	Streptococcus pnumoniae	60	Female	0	2	Recovered	End stage renal disease	Y	-	18	422	79.2	8.4	-	Severe
Ot3	Enterococus faecium	54	Female	0	5	Dead	T2D, Hypertension	Y	Y	18.4	284	84.2	13.4	-	Severe
Ot4	Klebsiella pneumoniae	74	Female	1	9	Not improved	T2D	-	Y	10.7	218	84.7	1.9	0.9	Severe
Ot5	Pseudomonas aeruginosa	77	Female	0	2	Not improved	T2D, COPD, Chronic renal failure	-	-	-	-	-	-	-	Severe
Ot6	Escherichia coli (ESBL)	70	Female	1	6	Recovered	Renal failure	Y	-	-	-	-	-	0.3	Severe
HC1	-	59	Male	-	-	-	-	-	-	-	-	-	-	-	-
HC2	-	60	Male	-	-	-	-	-	-	-	-	-	-	-	-
HC3	-	57	Female	-	-	-	-	-	-	-	-	-	-	-	-
HC4	-	64	Female	-	-	-	-	-	-	-	-	-	-	-	-
HC5	-	56	Male	-	-	-	-	-	-	-	-	-	-	-	-
HC6	-	56	Male	-	-	-	-	-	-	-	-	-	-	-	-
ESBL = Extended spectrum beta-lactamase
T2D = Type II diabetes mellitus
Y = Present
*Based on Dellinger et al, 2003 and the present of shock, acute renal failure or dead.
